# Supplementary material for: Holocene paleolimnological changes in Rundvågshetta lakes of the Soya Coast region and their paleoenvironmental significance with glacio-isostatic uplift in East Antarctica
Source: Research Square preprint supplement (doi:10.21203/rs.3.rs-1312982/v1), 2022-02-08
Supplement: Supplementary file 1 [file 843a824115859604204a5f16.docx]

**Appendices**Geochemistry and sedimentary facies of major elements in the two lake sediments of Rundvågshetta. Principal component load and correlation matrix for L. Maruwanminami-ike (Code: Ms5S, n = 24) and L. Maruwan-oike (code: Mw5S; n = 24).
